# Supplementary material
Source: PubMed Central journal article supplement (PMC7097841)
Supplement: jamacardiol-5-802-s001.pdf [file jamacardiol-5-802-s001.pdf]

## Supplementary Online Content

Shi S, Qin M, Shen B, et al. Association of cardiac injury with mortality in hospitalized patients with COVID-19 in Wuhan, China. *JAMA Cardiol*. Published online March 25, 2020. doi:10.1001/jamacardio.2020.0950

**eTable.** Baseline characteristics of 229 excluded patients with COVID-19.

**eFigure 1.** Distribution of hs-TNI.

**eFigure 2.** Representative electrocardiogram performance in three patients with cardiac injury.

**eFigure 3.** Mortality of patients at different concentrations of hs-TNI. Higher mortality was accompanied by higher hs-TNI concentrations.

This supplementary material has been provided by the authors to give readers additional information about their work.

**eTable. Baseline characteristics of 229 excluded patients with COVID-19**

| <b>Characteristics</b>                 | <b>All Patients<br/>(n = 229)</b> |
|----------------------------------------|-----------------------------------|
| Age (yrs), Median (range)              | 45 (22-90)                        |
| Female, n (%)                          | 130 (56.8)                        |
| Signs and symptoms at admission, n (%) |                                   |
| Fever                                  | 193 (84.3)                        |
| Cough                                  | 72 (31.4)                         |
| Shortness of breath                    | 51 (22.3)                         |
| Fatigue                                | 34 (14.8)                         |
| Sputum production                      | 25 (10.9)                         |
| Muscle ache                            | 19 (8.3)                          |
| Diarrhea                               | 13 (5.7)                          |
| Chest pain                             | 8 (3.5)                           |
| Sore throat                            | 6 (2.6)                           |
| Rhinorrhea                             | 6 (2.6)                           |
| Headache                               | 4 (1.7)                           |
| Chronic medical illness, n (%)         |                                   |
| Hypertension                           | 55 (24.0)                         |
| Diabetes                               | 17 (7.4)                          |
| COPD                                   | 8 (3.5)                           |
| Coronary heart disease                 | 4 (1.7)                           |
| Cerebrovascular disease                | 4 (1.7)                           |
| Chronic heart failure                  | 3 (1.3)                           |
| Chronic renal failure                  | 2 (0.9)                           |
| Hepatitis B infection                  | 2 (0.9)                           |
| Cancer                                 | 1 (0.4)                           |
| Pregnancy                              | 1 (0.4)                           |

yrs =years; COPD = chronic obstructive pulmonary disease.

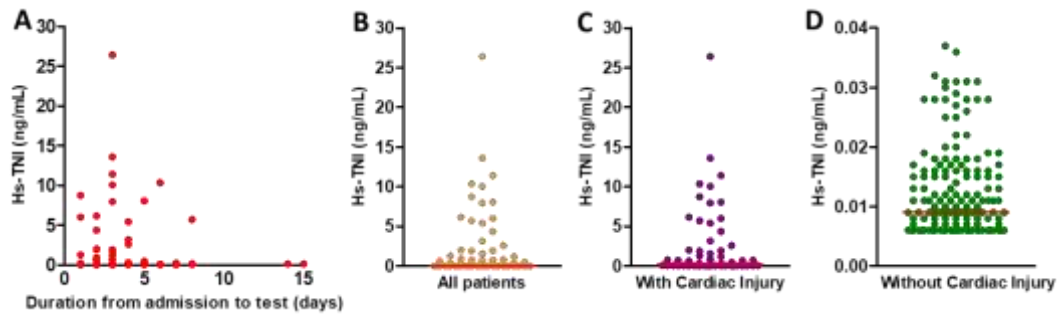

**Figure 1.** Distribution of hs-TNI. Distribution of hs-TNI based on detection time from hospitalization in all included patients (A), and the full distribution as a scatter plot in all patients (B), patients with (C) and without cardiac injury (D). The red line (B-D) represents the position of the median. Hs-TNI = High-sensitivity troponin I.

**Patient 1**

Male, 73 years old

Feb 1: hs-TNI, 6.159 ng/mL

Feb 1: ECG

I, avL lead: T wave inversion

III, avF lead: Q wave, T wave inversion

II, V2-V6 lead: ST depression, T wave inversion

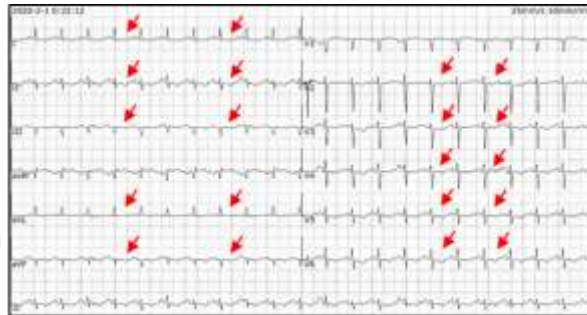

**Patient 2**

Male, 47 years old

Feb 3: hs-TNI, 0.135 ng/mL

Feb 2: ECG

III and avF lead, T wave inversion

V1-V6 lead, T wave inversion or depression

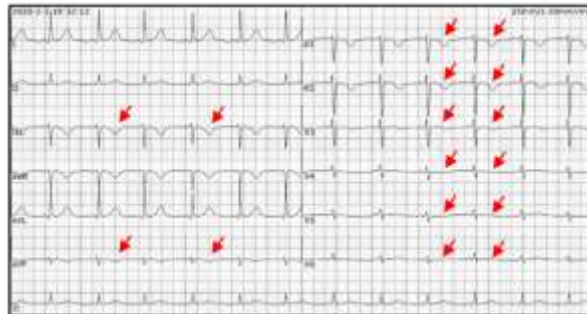

**Patient 3**

Female, 76 years old

Feb 6: hs-TNI, 0.159 ng/mL

Feb 6: ECG

I, II, III, avF, V3-V6 lead: T wave inversion

avL lead: T wave depression

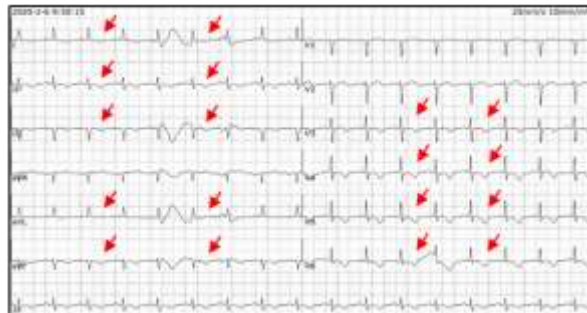

**eFigure 2.** Representative electrocardiogram performance in three patients with cardiac injury. Electrocardiogram showed myocardial ischemia-like phenomenon in pairs of leads, including ST segment depression, T wave depression and inversion, and Q wave formation. Red arrow represents myocardial ischemia-like ECG changes. Hs-TNI = High-sensitivity troponin I; ECG= electrocardiogram.

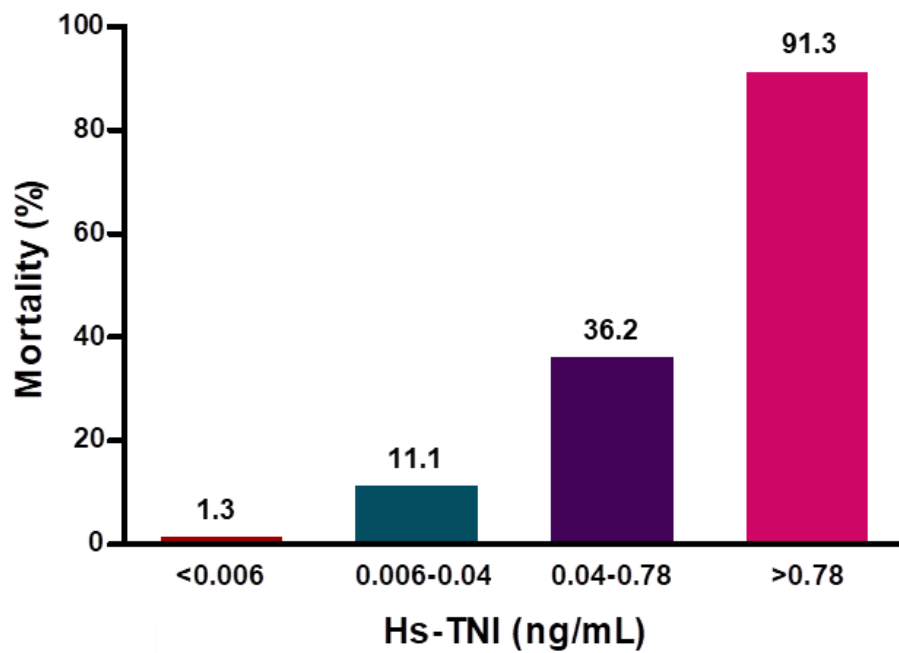

|                 | <0.006 | 0.006-0.04 | 0.04-0.78 | >0.78 |
|-----------------|--------|------------|-----------|-------|
| No. of events   | 3      | 12         | 21        | 21    |
| No. of patients | 227    | 108        | 58        | 23    |

**eFigure 3.** Mortality of patients at different concentrations of hs-TNI. Higher mortality was accompanied by higher hs-TNI concentrations. The thresholds of hs-TNI selected are based on the reference value, <0.006 ng/mL is the lowest value in our hospital laboratory, 0.006-0.04 ng/mL is the biological reference interval, >0.04 ng/mL indicating cardiac injury, and >0.78 ng/mL suggesting myocardial infarction is possible. Hs-TNI = High-sensitivity troponin I.
